# Supplementary material for: First Report of the Potential Bovine Spongiform Encephalopathy (BSE)-Related Somatic Mutation E211K of the Prion Protein Gene (PRNP) in Cattle
Source: PubMed Central journal article supplement (PMC7352198; doi:10.3390/ijms21124246), 2020-06-15
Supplement: ijms-21-04246-s001.pdf [file ijms-21-04246-s001.pdf]

**Supplementary Table S1** In-silico annotations of pathogenic *PRNP* mutations in human prion diseases

| Mutations  | PolyPhen-2 |                   | PANTHER              |                   |
|------------|------------|-------------------|----------------------|-------------------|
|            | Score      | Prediction        | Preservation<br>time | Prediction        |
| S17G       | 0.528      | Possibly damaging | 176                  | Probably benign   |
| P39L       | 1.000      | Probably damaging | 361                  | Possibly damaging |
| P102L      | 1.000      | Probably damaging | 361                  | Possibly damaging |
| P105L      | 1.000      | Probably damaging | 324                  | Possibly damaging |
| P105T      | 0.998      | Probably damaging | 324                  | Possibly damaging |
| P105S      | 0.997      | Probably damaging | 324                  | Possibly damaging |
| G114V      | 1.000      | Probably damaging | 220                  | Possibly damaging |
| A117V      | 0.999      | Probably damaging | 176                  | Probably benign   |
| G131V      | 1.000      | Probably damaging | 361                  | Possibly damaging |
| D167N      | 0.001      | Benign            | 220                  | Possibly damaging |
| V176G      | 0.998      | Probably damaging | 361                  | Possibly damaging |
| D178N-129M | 1.000      | Probably damaging | 361                  | Possibly damaging |
| D178N-129V | 1.000      | Probably damaging | 361                  | Possibly damaging |
| V180I      | 0.009      | Benign            | 220                  | Possibly damaging |
| T183A      | 0.978      | Probably damaging | 324                  | Possibly damaging |
| H187R      | 0.989      | Probably damaging | 220                  | Possibly damaging |
| T188K      | 0.996      | Probably damaging | 324                  | Possibly damaging |

|       |       |                   |     |                   |
|-------|-------|-------------------|-----|-------------------|
| E196K | 0.624 | Possibly damaging | 220 | Possibly damaging |
| E196A | 0.472 | Possibly damaging | 220 | Possibly damaging |
| F198S | 0.994 | Probably damaging | 220 | Possibly damaging |
| E200K | 0.995 | Probably damaging | 361 | Possibly damaging |
| E200G | 0.994 | Probably damaging | 361 | Possibly damaging |
| D202N | 1.000 | Probably damaging | 220 | Possibly damaging |
| V203I | 0.001 | Benign            | 176 | Probably benign   |
| R208C | 1.000 | Probably damaging | 220 | Possibly damaging |
| R208H | 0.999 | Probably damaging | 220 | Possibly damaging |
| V210I | 0.803 | Possibly damaging | 220 | Possibly damaging |
| E211Q | 0.992 | Probably damaging | 220 | Possibly damaging |
| Q212P | 0.930 | Possibly damaging | 220 | Possibly damaging |
| I215V | 0.000 | Benign            | 220 | Possibly damaging |
| Q217R | 0.961 | Probably damaging | 220 | Possibly damaging |
| M232R | 0.082 | Benign            | 91  | Probably benign   |
| M232T | 0.000 | Benign            | 91  | Probably benign   |
| P238S | 1.000 | Probably damaging | 361 | Possibly damaging |

---
